# Supplementary material
Source: MDPI journal article supplement (https://www.mdpi.com/2304-6740/12/3/72)
Supplement: s1 [file s1]

# Supporting Information

## Alkane Elimination Preparation of Heterobimetallic MoAl Tetranuclear and Binuclear Complexes

*Léon Escomel,<sup>[a]</sup> Erwann Jeanneau,<sup>[b]</sup> Chloé Thieuleux<sup>[a]</sup> and Clément Camp<sup>\*[a]</sup>*

[a] Laboratory of Chemistry, Catalysis, Polymerization and Processes, CP2M UMR 5128, Université de Lyon, Institut de Chimie de Lyon, CNRS, Université Lyon 1, CPE Lyon, 43 Bd du 11 Novembre 1918, F-69616 Villeurbanne, France.

[b] Université de Lyon, Centre de Diffractométrie Henri Longchambon, 5 Rue de la Doua, 69100 Villeurbanne, France.

### Content

|    |                             |    |
|----|-----------------------------|----|
| A. | NMR spectroscopic data..... | 2  |
| B. | IR spectroscopic data.....  | 13 |
| C. | X-ray crystallography.....  | 14 |

## A. NMR spectroscopic data

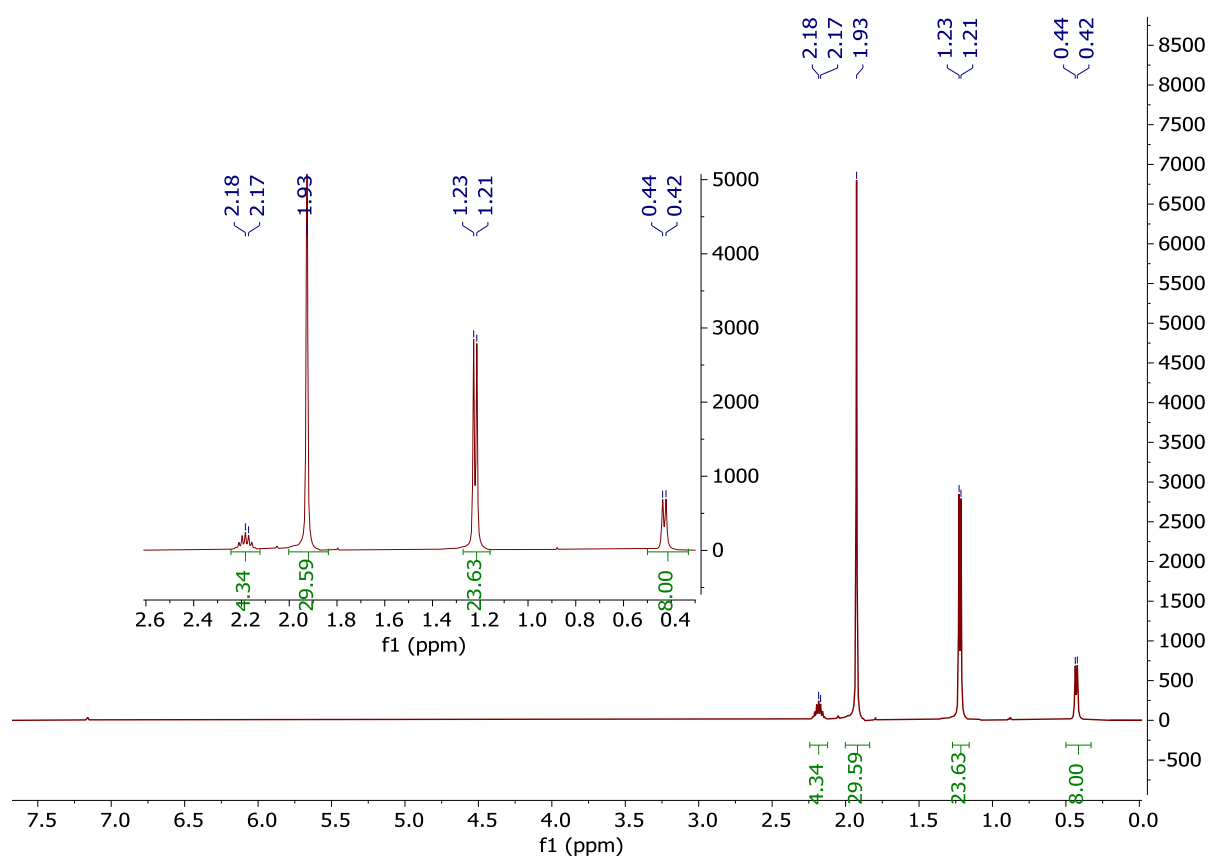

**Figure S1.**  $^1\text{H}$  NMR spectrum (293K, 500 MHz,  $\text{C}_6\text{D}_6$ ) of compound **1**.

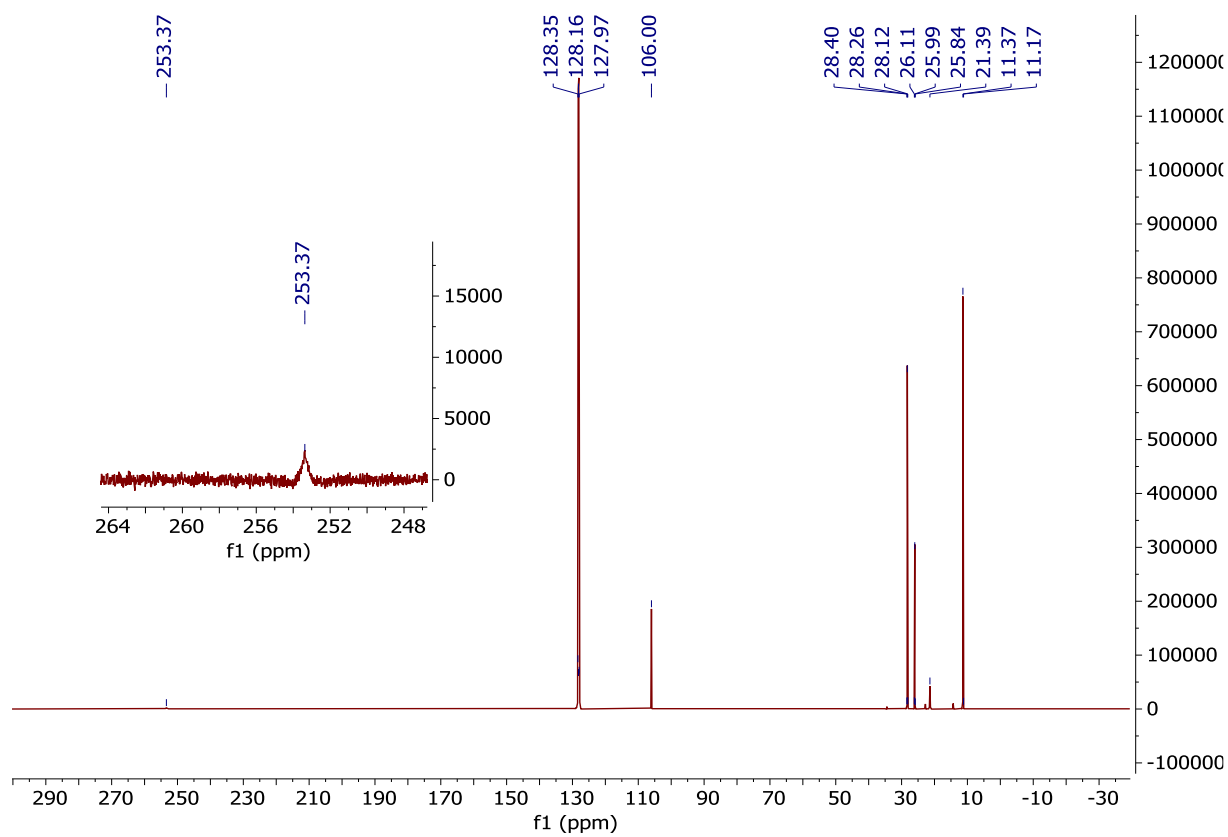

**Figure S2.**  $^{13}\text{C}\{^1\text{H}\}$ -NMR (125 MHz,  $\text{C}_6\text{D}_6$ , RT) of compound 1.

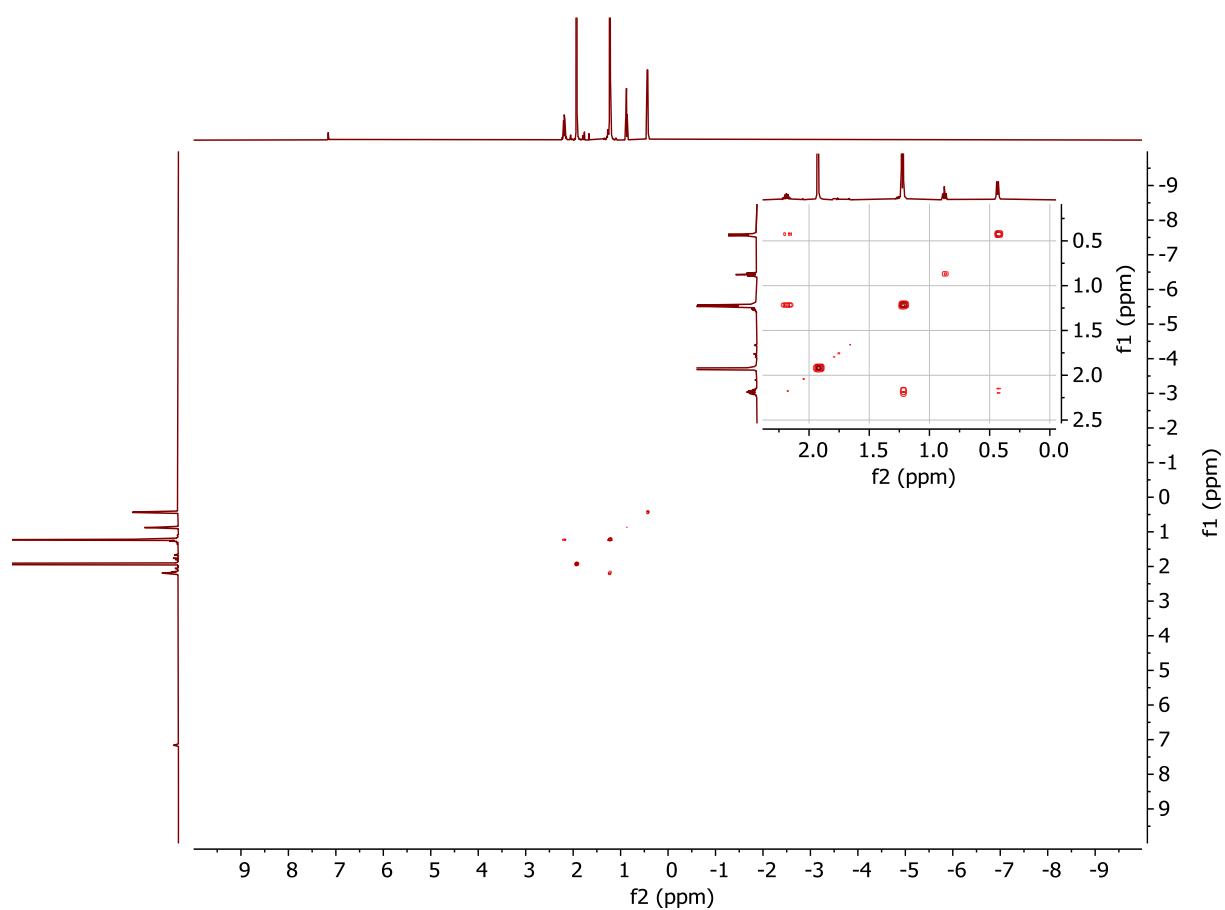

**Figure S3.**  $^1\text{H}$ - $^1\text{H}$ -COSY (500 MHz,  $\text{C}_6\text{D}_6$ , RT) of compound **1**.

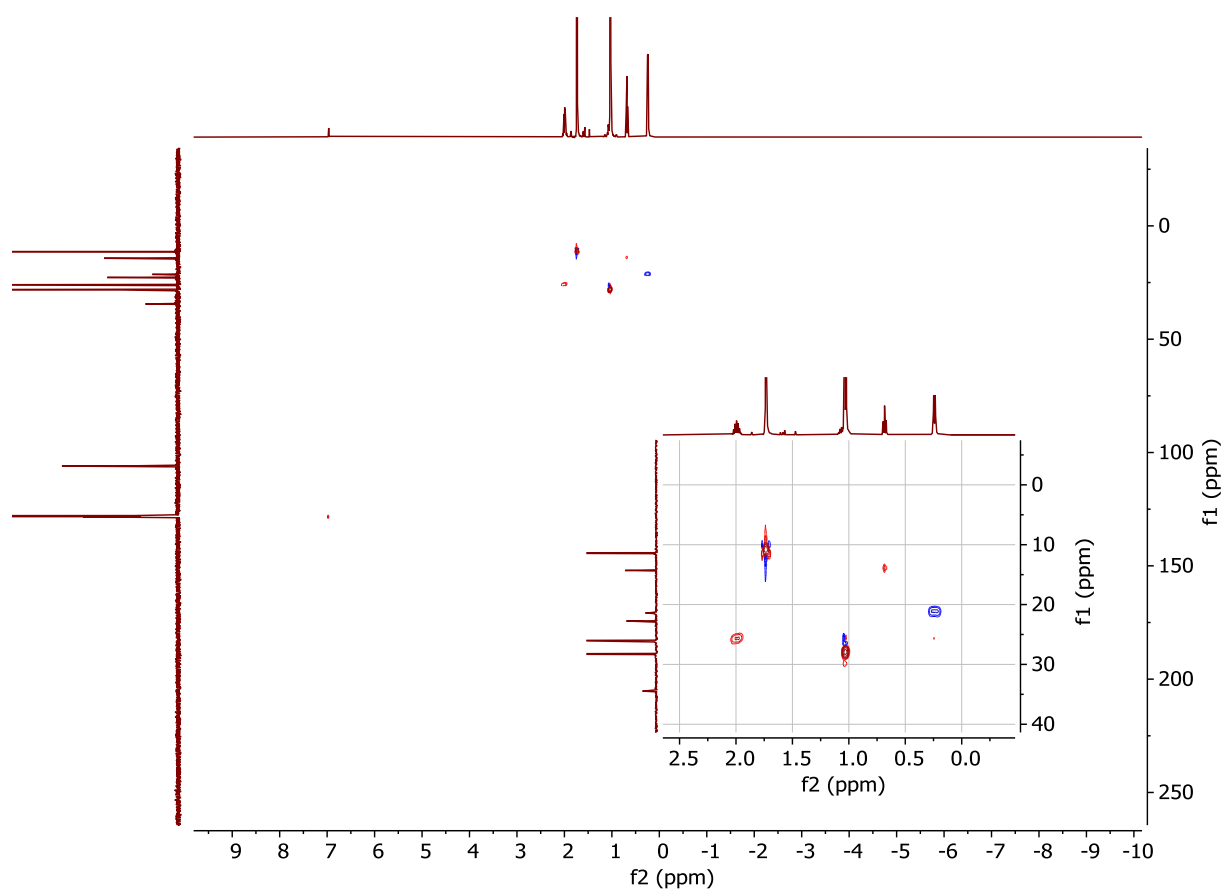

**Figure S4.**  $^1\text{H}$ - $^{13}\text{C}$ -HSQC (500 MHz,  $\text{C}_6\text{D}_6$ , RT) of compound **1**.

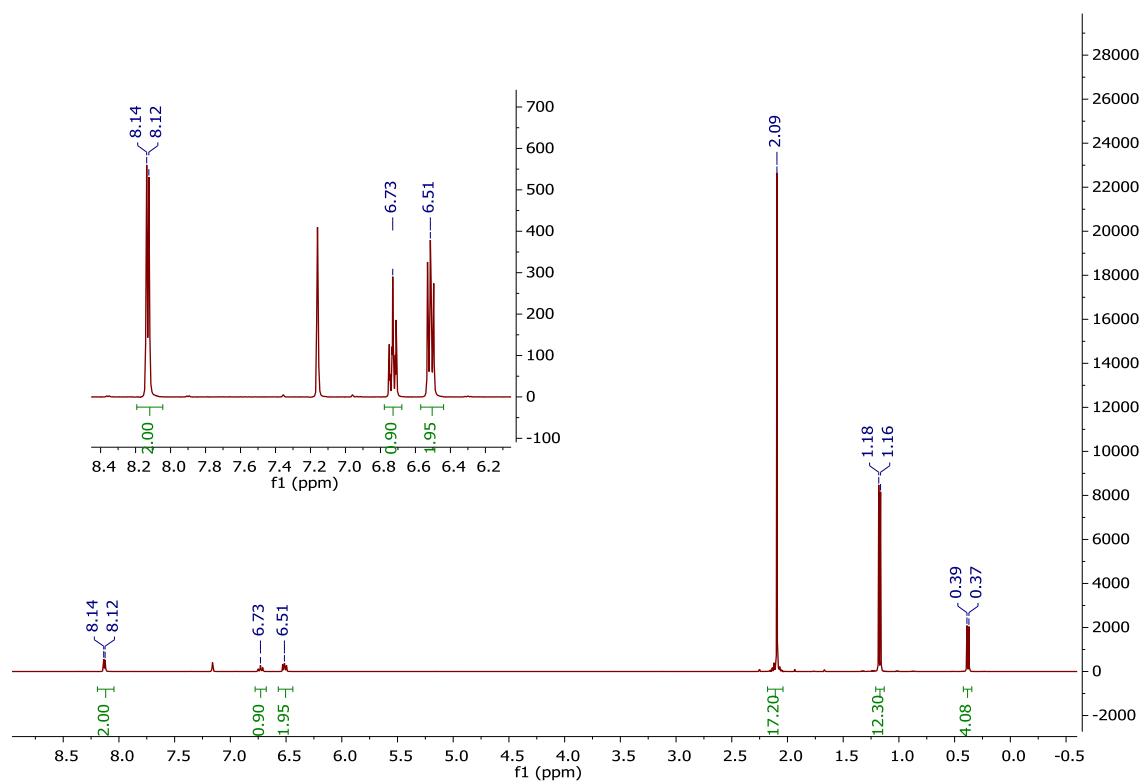

**Figure S5.**  $^1\text{H}$  NMR spectrum (293K, 500 MHz,  $\text{C}_6\text{D}_6$ ) of compound **2**.

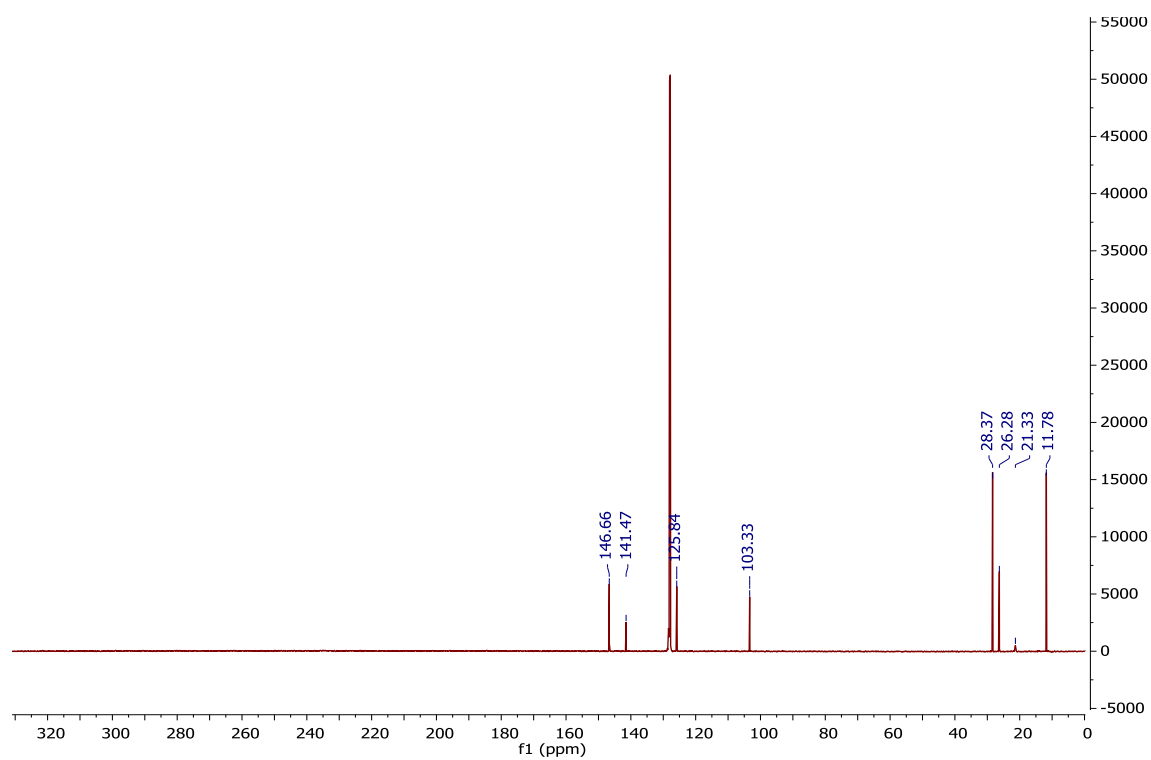

**Figure S6.**  $^{13}\text{C}\{^1\text{H}\}$ -NMR (125 MHz,  $\text{C}_6\text{D}_6$ , RT) of compound **2**.

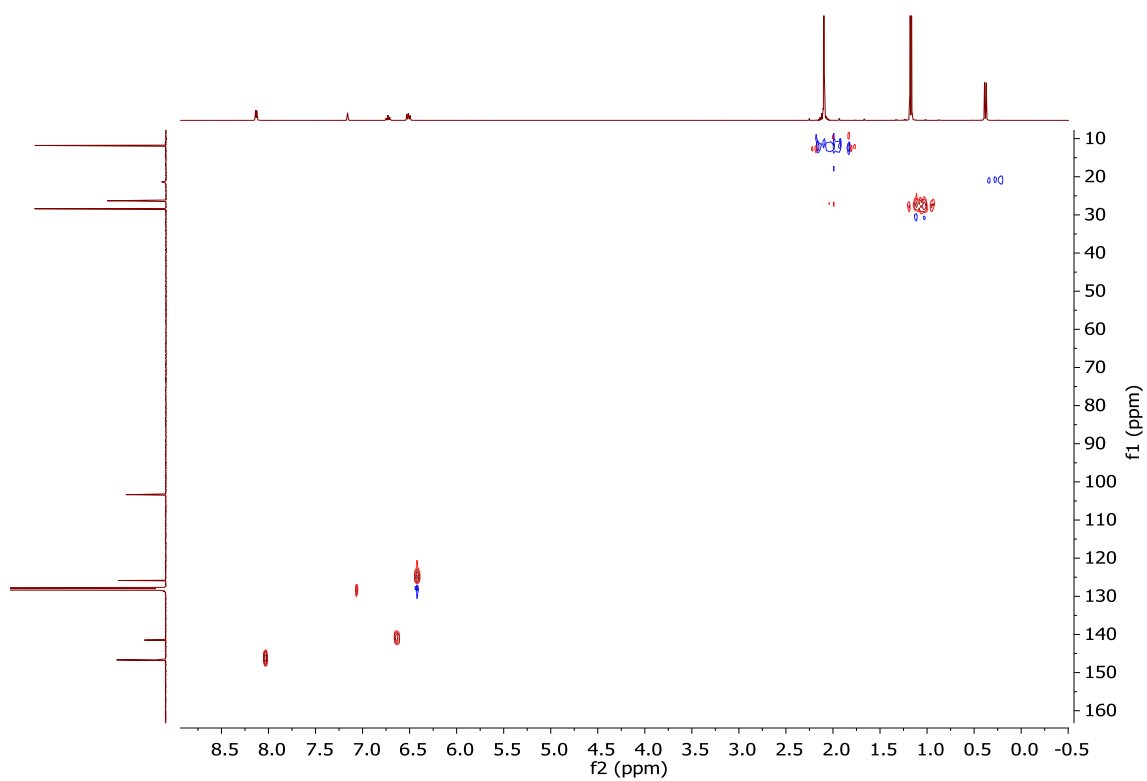

**Figure S7.**  $^1\text{H}$ - $^{13}\text{C}$ -HSQC (500 MHz,  $\text{C}_6\text{D}_6$ , RT) of compound **2**.



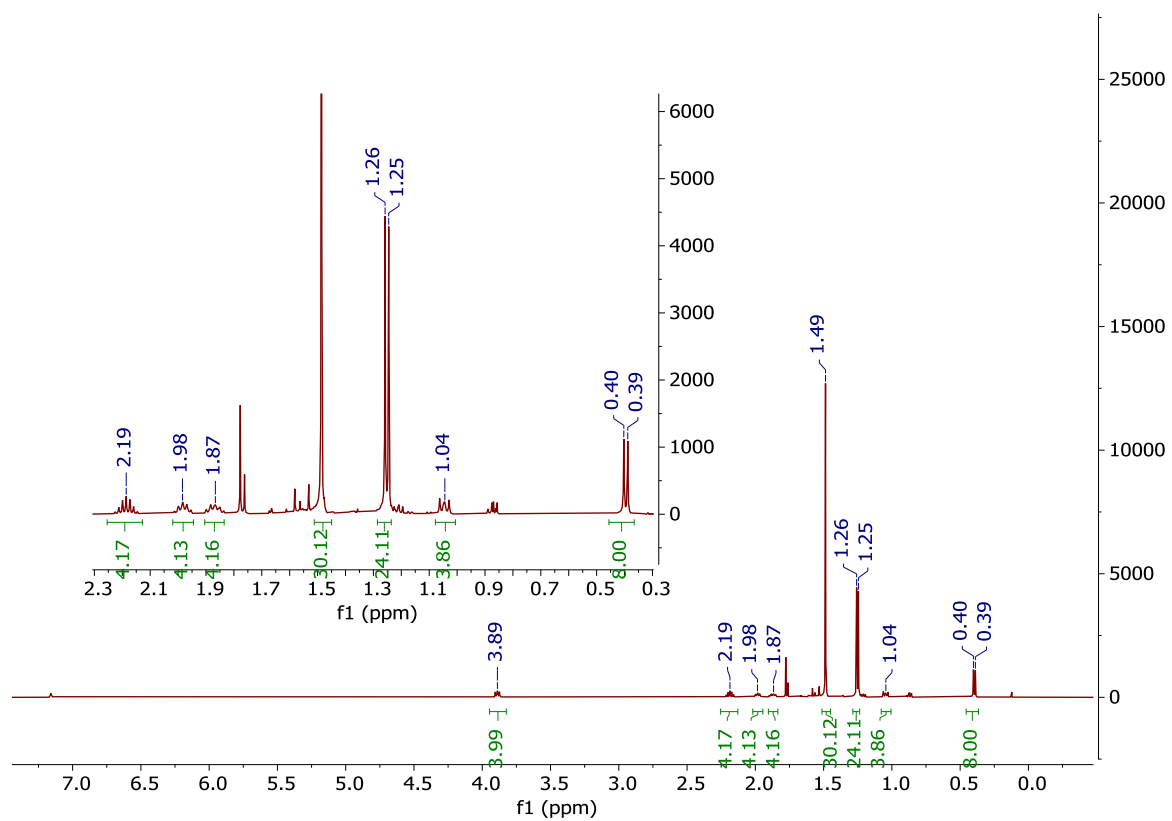

**Figure S8.**  $^1\text{H}$  NMR spectrum (293K, 500 MHz,  $\text{C}_6\text{D}_6$ ) of compound **3**.

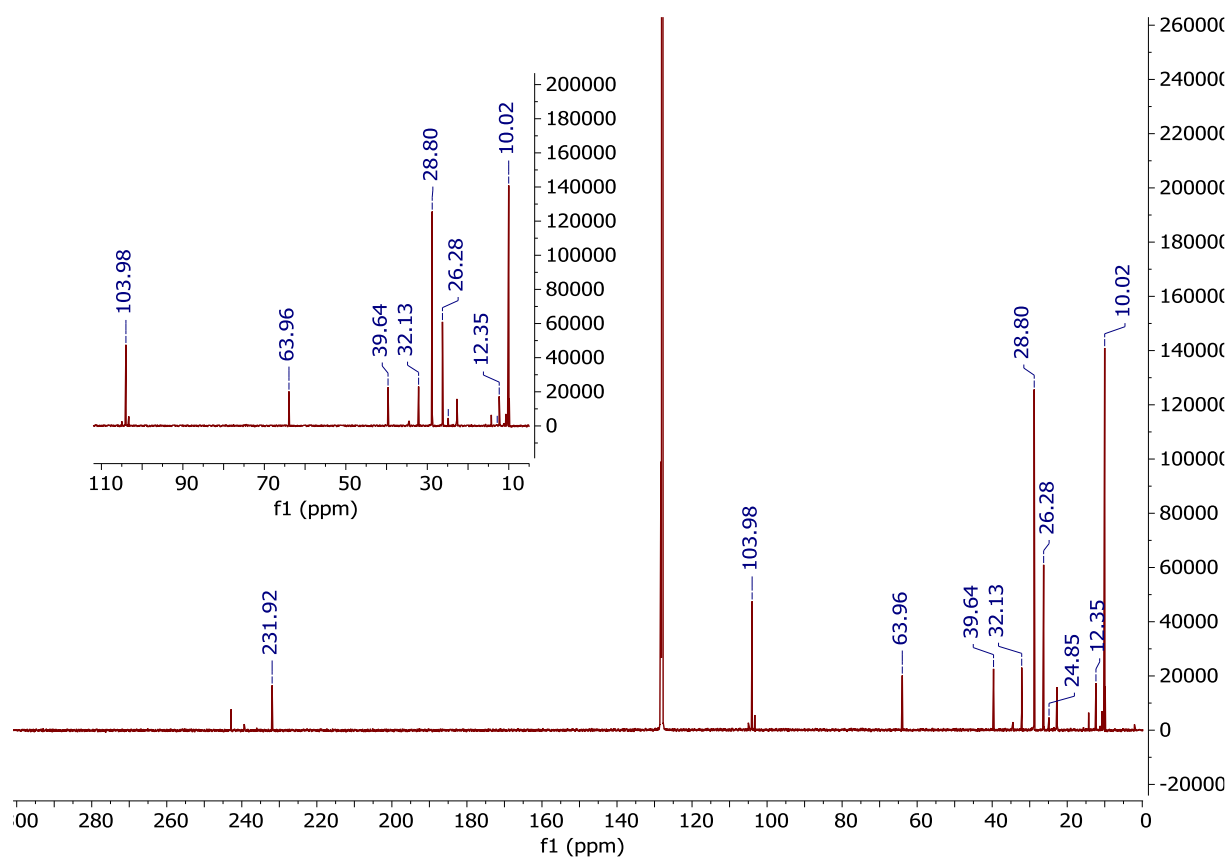

**Figure S9.**  $^{13}\text{C}\{^1\text{H}\}$ -NMR (125 MHz,  $\text{C}_6\text{D}_6$ , RT) of compound **3**.

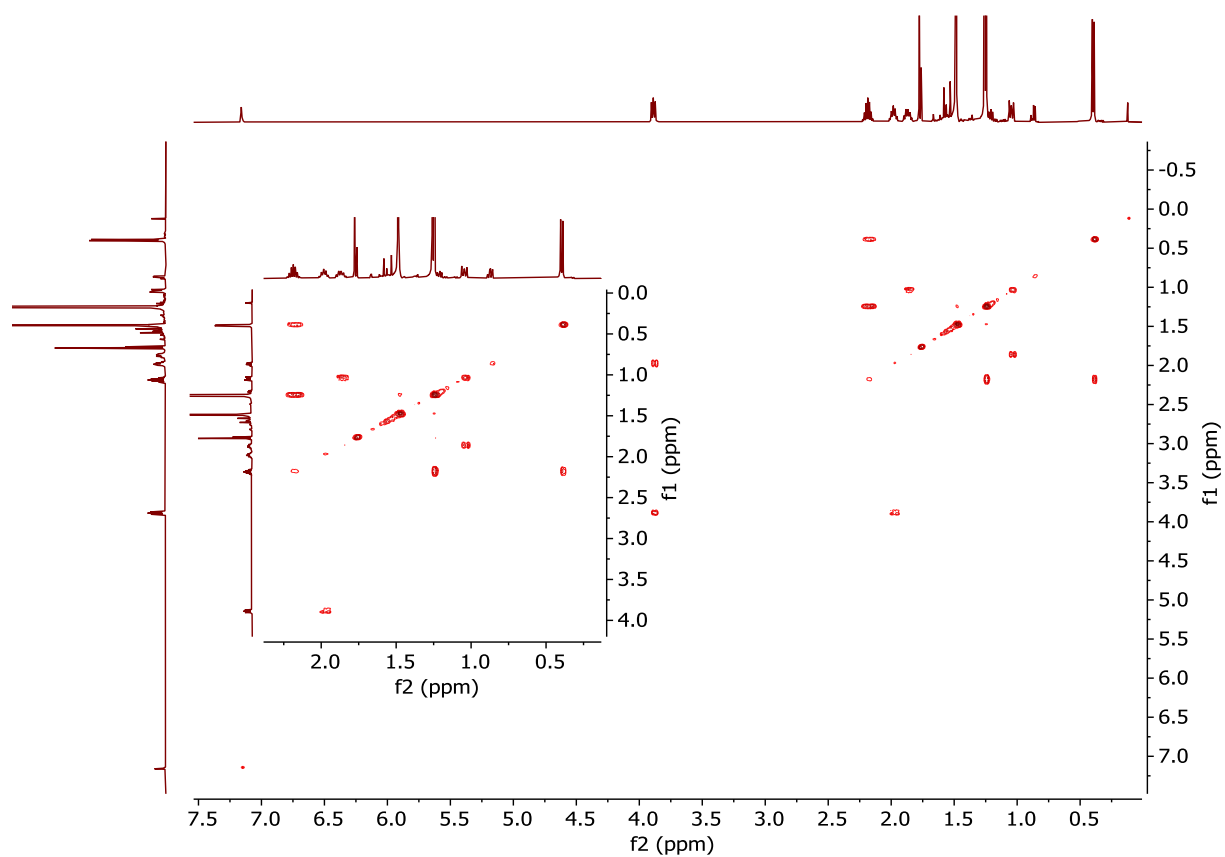

**Figure S10.**  $^1\text{H}$ - $^1\text{H}$ -COSY (500 MHz,  $\text{C}_6\text{D}_6$ , RT) of compound **3**.

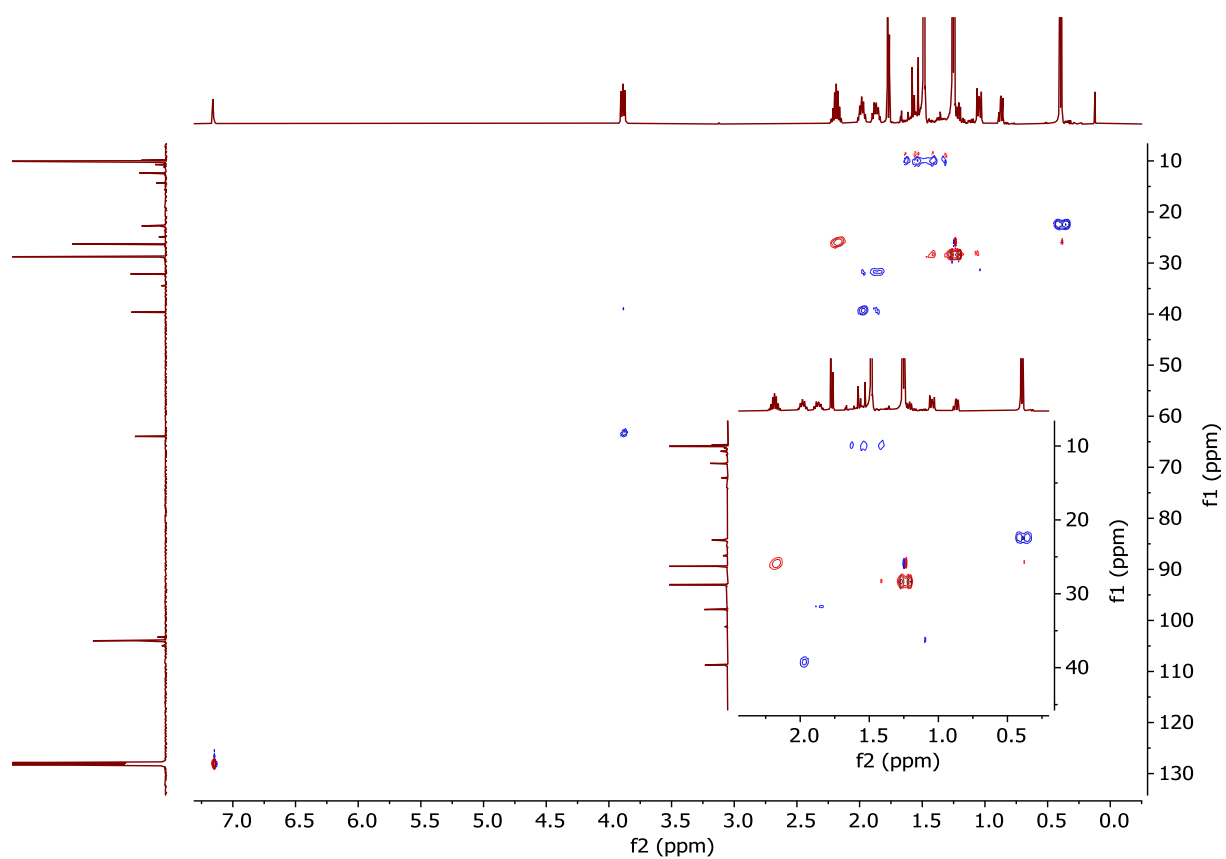

**Figure S11.**  $^1\text{H}$ - $^{13}\text{C}$ -HSQC (500 MHz,  $\text{C}_6\text{D}_6$ , RT) of compound **3**

## B. IR spectroscopic data

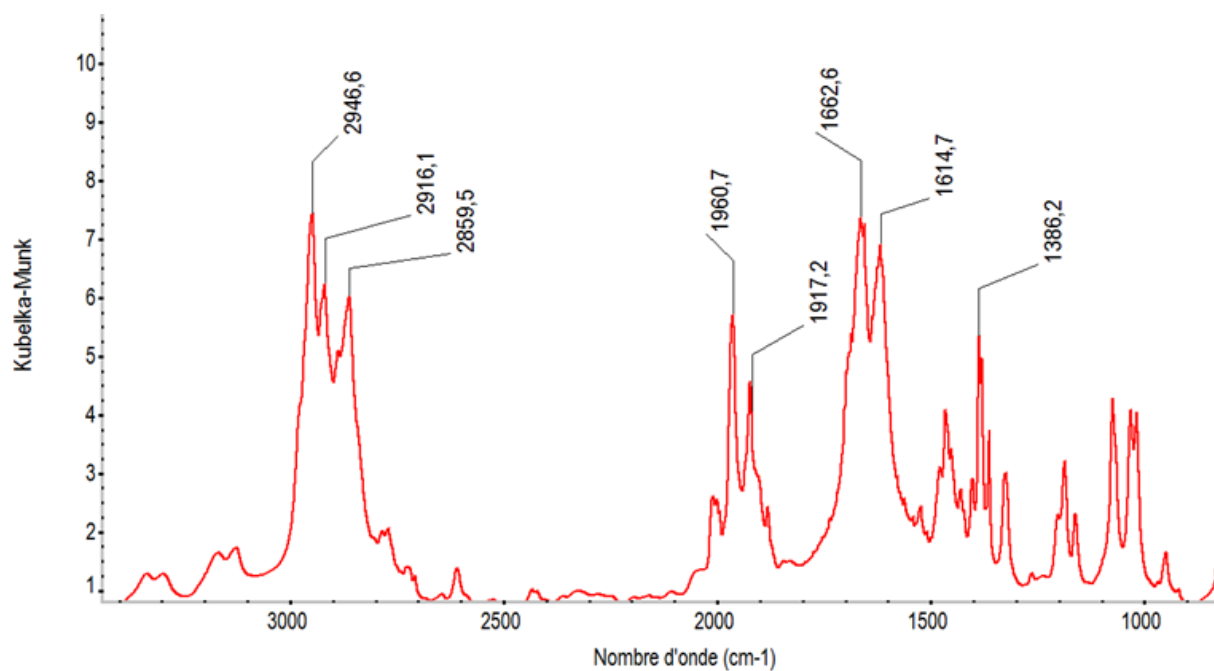

**Figure S12.** DRIFT spectrum (25°C, KBr dilution under argon) for compound **1**.

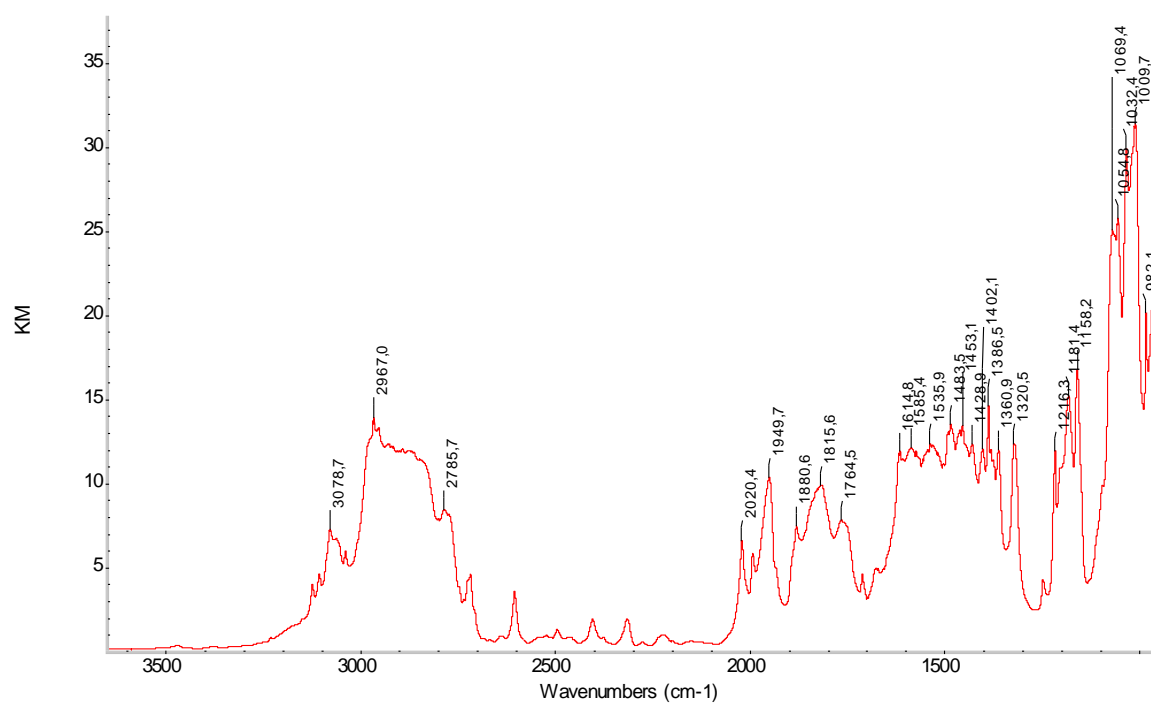

**Figure S13.** DRIFT spectrum (25°C, KBr dilution under argon) for compound **2**.

## C. X-ray crystallography

Table S1. Crystallographic parameters for compounds **1**, **2** and **3**.

| Compound                                   | <b>1</b>                                                                       | <b>2</b>                                            | <b>3</b>                                                                       |
|--------------------------------------------|--------------------------------------------------------------------------------|-----------------------------------------------------|--------------------------------------------------------------------------------|
| Formula                                    | C <sub>42</sub> H <sub>66</sub> Al <sub>2</sub> Mo <sub>2</sub> O <sub>6</sub> | C <sub>26</sub> H <sub>38</sub> AlMoNO <sub>3</sub> | C <sub>50</sub> H <sub>82</sub> Al <sub>2</sub> Mo <sub>2</sub> O <sub>8</sub> |
| cryst syst                                 | Triclinic                                                                      | Monoclinic                                          | Monoclinic                                                                     |
| space group                                | <i>P</i> -1                                                                    | <i>P</i> 2 <sub>1</sub> / <i>c</i>                  | <i>P</i> 2 <sub>1</sub> / <i>n</i>                                             |
| volume (Å <sup>3</sup> )                   | 1144.79(5)                                                                     | 2734.6(7)                                           | 2774.0(6)                                                                      |
| a (Å)                                      | 8.9496(2)                                                                      | 11.9297(18)                                         | 9.2045(15)                                                                     |
| b (Å)                                      | 11.9141(3)                                                                     | 14.9777(17)                                         | 8.6863(13)                                                                     |
| c (Å)                                      | 11.9303(3)                                                                     | 15.841(3)                                           | 34.746(5)                                                                      |
| α (deg)                                    | 76.824(2)                                                                      | 90                                                  | 90                                                                             |
| β (deg)                                    | 68.147(2)                                                                      | 104.963(15)                                         | 93.083(13)                                                                     |
| γ (deg)                                    | 89.867(2)                                                                      | 90                                                  | 90                                                                             |
| z                                          | 1 (Z'=0.5)                                                                     | 4                                                   | 2 (Z'=0.5)                                                                     |
| formula weight (g/mol)                     | 912.78                                                                         | 535.49                                              | 1057.04                                                                        |
| density (g cm <sup>-3</sup> )              | 1.324                                                                          | 1.301                                               | 1.265                                                                          |
| absorption coefficient (mm <sup>-1</sup> ) | 0.627                                                                          | 0.537                                               | 0.529                                                                          |
| F(000)                                     | 476.00                                                                         | 1120                                                | 1112                                                                           |
| θ <sub>max</sub> (°)                       | 29.540                                                                         | 29.496                                              | 29.607                                                                         |
| temp (K)                                   | 150.00(10)                                                                     | 150.00(10)                                          | 150.00(10)                                                                     |
| total no. reflections                      | 25257                                                                          | 18783                                               | 38093                                                                          |
| indepentant reflections [R(int)]           | 5676 [0.0274]                                                                  | 6362 [0.1006]                                       | 6807 [/]                                                                       |
| no. refined parameters                     | 244                                                                            | 299                                                 | 291                                                                            |
| Final R indices [I > 2σ(I)]                | R1 = 0.0263<br>wR2 = 0.0652                                                    | R1 = 0.0659<br>wR2 = 0.0976                         | R1 = 0.1265<br>wR2 = 0.2619                                                    |
| GoF                                        | 1.144                                                                          | 1.065                                               | 1.094                                                                          |

CCDC 2330941 to 2330943 contain the supplementary crystallographic data for this paper. These data are provided free of charge by the Cambridge Crystallographic Data Centre.
